# Supplementary material for: Neutrophil to lymphocyte ratio (NLR) prognostic effects on heart failure; a systematic review and meta-analysis
Source: PubMed Central journal article supplement (PMC10644447; doi:10.1186/s12872-023-03572-6), 2023-11-14
Supplement: 12872_2023_3572_MOESM1_ESM.pdf [file 12872_2023_3572_MOESM1_ESM.pdf]

|                                                                             |     |
|-----------------------------------------------------------------------------|-----|
| 16. Were the results for the analyses described in the methods, presented?  | Yes |
|                                                                             | Yes |
|                                                                             | Yes |
|                                                                             | Yes |
|                                                                             | Yes |
|                                                                             | Yes |
|                                                                             | Yes |
|                                                                             | Yes |
|                                                                             | Yes |
|                                                                             | Yes |
|                                                                             | Yes |
|                                                                             | Yes |
|                                                                             | Yes |
|                                                                             | Yes |
|                                                                             | Yes |
|                                                                             | Yes |
|                                                                             | Yes |
|                                                                             | Yes |
|                                                                             | Yes |
|                                                                             | Yes |
|                                                                             | Yes |
|                                                                             | Yes |
|                                                                             | Yes |
|                                                                             | Yes |
|                                                                             | Yes |
|                                                                             | Yes |
|                                                                             | Yes |
|                                                                             | Yes |
|                                                                             | Yes |
|                                                                             | Yes |
|                                                                             | Yes |
|                                                                             | Yes |
|                                                                             | Yes |
|                                                                             | Yes |
| 17. Were the authors' discussions and conclusions justified by the results? | Yes |
|                                                                             | Yes |
|                                                                             | Yes |
|                                                                             | Yes |
|                                                                             | Yes |
|                                                                             | Yes |
|                                                                             | Yes |
|                                                                             | Yes |
|                                                                             | Yes |
|                                                                             | Yes |
|                                                                             | Yes |
|                                                                             | Yes |
|                                                                             | Yes |
|                                                                             | Yes |
|                                                                             | Yes |
|                                                                             | Yes |
|                                                                             | Yes |
|                                                                             | Yes |
|                                                                             | Yes |
|                                                                             | Yes |
|                                                                             | Yes |
|                                                                             | Yes |
|                                                                             | Yes |
|                                                                             | Yes |
|                                                                             | Yes |
|                                                                             | Yes |
|                                                                             | Yes |
|                                                                             | Yes |
|                                                                             | Yes |
|                                                                             | Yes |
|                                                                             | Yes |
|                                                                             | Yes |
|                                                                             | Yes |
|                                                                             | Yes |





**Table S2: Risk of bias assessment of cohort studies.**

| Major components                                                                                              | Delcea et al. 2021 | Angkananard et al. 2021 | Kose et al. 2020 | Cho et al. 2020 | Zhu et al. 2022 | Liu et al. 2022 |
|---------------------------------------------------------------------------------------------------------------|--------------------|-------------------------|------------------|-----------------|-----------------|-----------------|
| 1. Were the two groups similar and recruited from the same population?                                        | Not applicable     | Yes                     | Yes              | Yes             | Not applicable  | Not applicable  |
| 2. Were the exposures measured similarly to assign people to both exposed and unexposed groups?               | Not applicable     | Not applicable          | Yes              | Yes             | Not applicable  | Not applicable  |
| 3. Was the exposure measured in a valid and reliable way?                                                     | Not applicable     | Yes                     | Yes              | Yes             | Not applicable  | Not applicable  |
| 4. Were confounding factors identified?                                                                       | Yes                | Yes                     | Yes              | Yes             | Yes             | Yes             |
| 5. Were strategies to deal with confounding factors stated?                                                   | Yes                | Yes                     | Yes              | Yes             | Yes             | Yes             |
| 6. Were the groups/participants free of the outcome at the start of the study (or at the moment of exposure)? | Yes                | Yes                     | Yes              | Yes             | Yes             | Yes             |
| 7. Were the outcomes measured in a valid and reliable way?                                                    | Yes                | Yes                     | Yes              | Yes             | Yes             | Yes             |
| 8. Was the follow up time reported and sufficient to be long enough for outcomes to occur?                    | Yes                | Yes                     | Yes              | Yes             | Yes             | Yes             |
| 9. Was follow up complete, and if not, were the reasons to loss to follow up described and explored?          | Yes                | Yes                     | Yes              | Yes             | Yes             | Yes             |
| 10. Were strategies to address incomplete follow up utilized?                                                 | Not applicable     | Not applicable          | Not applicable   | Not applicable  | Not applicable  | Not applicable  |
| 11. Was appropriate statistical analysis used?                                                                | Yes                | Yes                     | Yes              | Yes             | Yes             | Yes             |

|                    |         |         |         |         |         |         |
|--------------------|---------|---------|---------|---------|---------|---------|
| Overall appraisal: | Include | Include | Include | Include | Include | Include |
|--------------------|---------|---------|---------|---------|---------|---------|

**Table S3. Heterogeneity results of included studies according to neutrophil to lymphocyte ratio.**

| Outcome of interest                | Q*       | I <sup>2</sup> ** | τ <sup>2</sup> *** | P      |
|------------------------------------|----------|-------------------|--------------------|--------|
| Mean NLR                           | 3717.161 | 99.03%            | 1.167              | <0.001 |
| Total mortality                    | 3465.655 | 99.27%            | 1.347              | <0.001 |
| Follow-up mortality                | 2285.622 | 99.21%            | 1.132              | <0.001 |
| In-hospital mortality              | 1456.922 | 99.38%            | 3.947              | <0.001 |
| NLR difference<br>(death/survival) | 2589.33  | 98.95%            | 2.773              | <0.001 |
| NLR difference<br>(HFpEF/HFrEF)    | 658.314  | 98.02%            | 1.05               | <0.001 |

\*: Cochran's Q statistic for heterogeneity, \*\*: Index for the degree of heterogeneity, \*\*\*: Tau-squared measure of heterogeneity.

NLR: neutrophil to lymphocyte ratio, HFpEF: heart failure with preserved ejection fraction, HFrEF: heart failure with reduced ejection fraction



**Table S4. Certainty evidence of NLR difference in deceased compared to survived groups in HF patients.**

| Certainty assessment  |                       |              |                      |              |             |                                                  | Nº of patients |          | Effect            |                                                  | Certainty        | Importance |
|-----------------------|-----------------------|--------------|----------------------|--------------|-------------|--------------------------------------------------|----------------|----------|-------------------|--------------------------------------------------|------------------|------------|
| Nº of studies         | Study design          | Risk of bias | Inconsistency        | Indirectness | Imprecision | Other considerations                             | Deceased       | Survived | Relative (95% CI) | Absolute (95% CI)                                |                  |            |
| <b>NLR difference</b> |                       |              |                      |              |             |                                                  |                |          |                   |                                                  |                  |            |
| 13                    | observational studies | not serious  | serious <sup>a</sup> | not serious  | not serious | publication bias strongly suspected <sup>b</sup> | 2299           | 5066     | -                 | SMD <b>0.67 SD more</b> (0.48 more to 0.87 more) | ⊕○○○<br>Very low | IMPORTANT  |

CI: confidence interval; SMD: standardised mean difference

### Explanations

a. Considerable I2 value

b. Evidence of publication bias using Duval and Tweedie's trim-and-fill method

**Table S5. Certainty evidence of high NLR compared to low NLR for clinical outcomes in HF subjects.**

| No of studies                           | Study design          | Certainty assessment |                      |                      |             |                      | No of patients                                                                                                                                                                                                  |         | Effect                 |                                             | Certainty        | Importance    |
|-----------------------------------------|-----------------------|----------------------|----------------------|----------------------|-------------|----------------------|-----------------------------------------------------------------------------------------------------------------------------------------------------------------------------------------------------------------|---------|------------------------|---------------------------------------------|------------------|---------------|
|                                         |                       | Risk of bias         | Inconsistency        | Indirectness         | Imprecision | Other considerations | High NLR                                                                                                                                                                                                        | Low NLR | Relative (95% CI)      | Absolute (95% CI)                           |                  |               |
| <b>Mortality hazard ratio</b>           |                       |                      |                      |                      |             |                      |                                                                                                                                                                                                                 |         |                        |                                             |                  |               |
| 6                                       | observational studies | not serious          | serious <sup>a</sup> | not serious          | not serious | none                 |                                                                                                                                                                                                                 |         | HR 1.77 (1.27 to 2.46) | 2 fewer per 1,000 (from 2 fewer to 1 fewer) | ⊕○○○<br>Very low | IMPORTANT     |
| <b>Death and/or re-hospitalization</b>  |                       |                      |                      |                      |             |                      |                                                                                                                                                                                                                 |         |                        |                                             |                  |               |
| 5                                       | observational studies | not serious          | not serious          | not serious          | not serious | none                 | HF patients with higher NLR values had higher likelihood of death and/or readmission.                                                                                                                           |         |                        |                                             | ⊕⊕○○<br>Low      | IMPORTANT     |
| <b>HF prediction</b>                    |                       |                      |                      |                      |             |                      |                                                                                                                                                                                                                 |         |                        |                                             |                  |               |
| 4                                       | observational studies | not serious          | not serious          | serious <sup>b</sup> | not serious | none                 | Two studies were in favor of independency of NLR for HF prediction. One study was in contrast to independency of NLR for HF prediction. One study was in favor of independency of NLR for severe HF prediction. |         |                        |                                             | ⊕○○○<br>Very low | IMPORTANT     |
| <b>Extended length of hospital stay</b> |                       |                      |                      |                      |             |                      |                                                                                                                                                                                                                 |         |                        |                                             |                  |               |
| 1                                       | observational studies | not serious          | not serious          | not serious          | not serious | none                 | Increased NLR was associated with higher odds of increased hospital stay length.                                                                                                                                |         |                        |                                             | ⊕⊕○○<br>Low      | NOT IMPORTANT |
| <b>Pulmonary resistance</b>             |                       |                      |                      |                      |             |                      |                                                                                                                                                                                                                 |         |                        |                                             |                  |               |
| 1                                       | observational studies | not serious          | not serious          | not serious          | not serious | none                 | HF patients with higher NLR had higher pulmonary vascular resistance and right ventricular systolic pressure compared to patients with lower NLR values.                                                        |         |                        |                                             | ⊕⊕○○<br>Low      | NOT IMPORTANT |
| <b>Atrial fibrillation</b>              |                       |                      |                      |                      |             |                      |                                                                                                                                                                                                                 |         |                        |                                             |                  |               |
| 1                                       | observational studies | not serious          | not serious          | not serious          | not serious | none                 | NLR was an independent predictor of atrial fibrillation in HF patients.                                                                                                                                         |         |                        |                                             | ⊕⊕○○<br>Low      | NOT IMPORTANT |
| <b>Renal disease</b>                    |                       |                      |                      |                      |             |                      |                                                                                                                                                                                                                 |         |                        |                                             |                  |               |
| 2                                       | observational studies | not serious          | not serious          | not serious          | not serious | none                 | All studies reported NLR as an independent factor for renal disease.                                                                                                                                            |         |                        |                                             | ⊕⊕○○<br>Low      | NOT IMPORTANT |
| <b>Functional class</b>                 |                       |                      |                      |                      |             |                      |                                                                                                                                                                                                                 |         |                        |                                             |                  |               |
| 1                                       | observational studies | not serious          | not serious          | not serious          | not serious | none                 | NLR was an independent predictor of poor functional class in HF.                                                                                                                                                |         |                        |                                             | ⊕⊕○○<br>Low      | NOT IMPORTANT |

CI: confidence interval; HR: hazard Ratio; NLR: neutrophil to lymphocyte ratio; HF: heart failure

**Explanations**

- a. Considerable I2 value
- b. Studies with different reports.

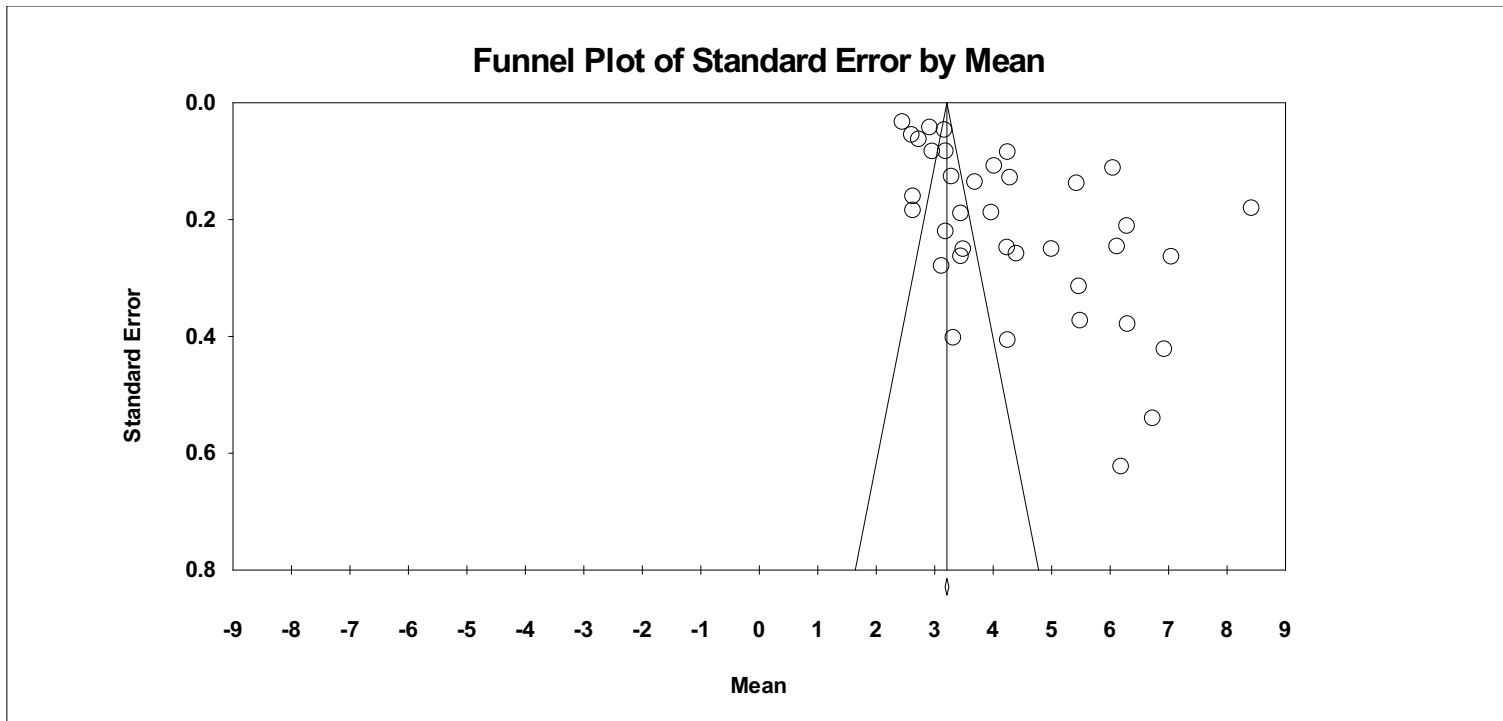

**Figure S1. Funnel plot for mean NLR based on total study population.**

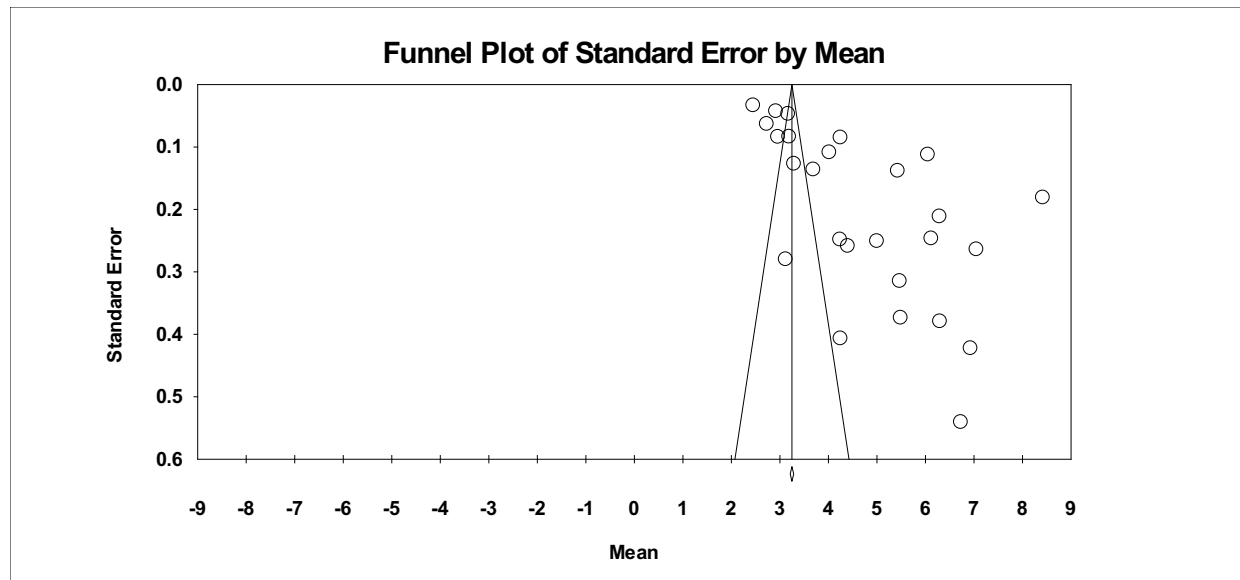

**Figure S2. Funnel plot for mean NLR according to studies reported mortality (follow-up or in-hospital mortality).**

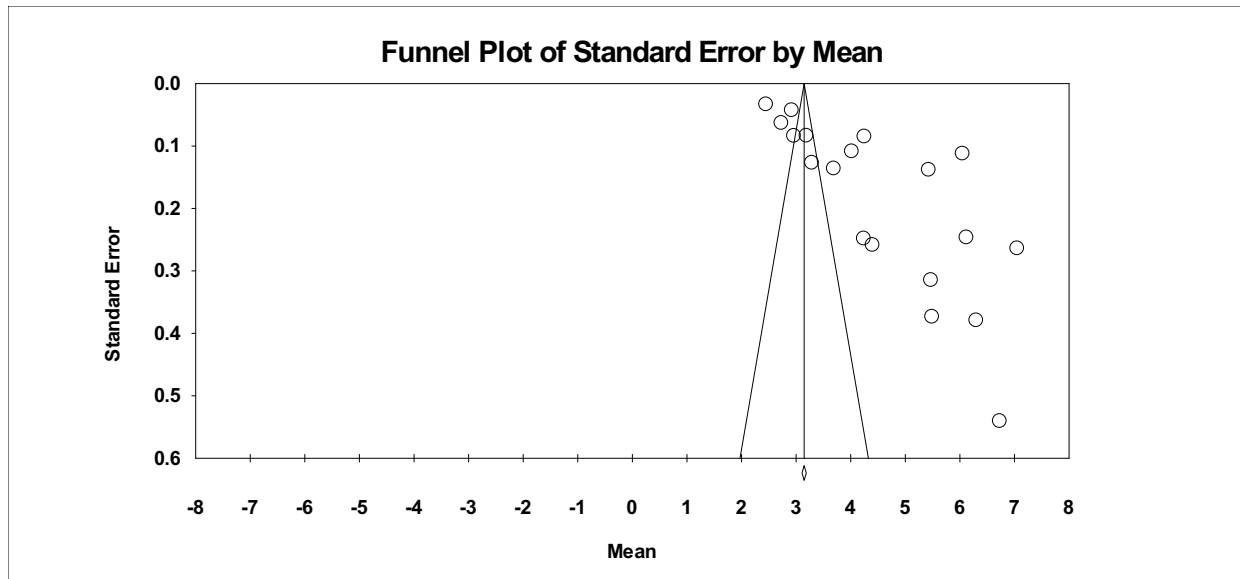

**Figure S3. Funnel plot for mean NLR according to studies reported follow-up mortality.**

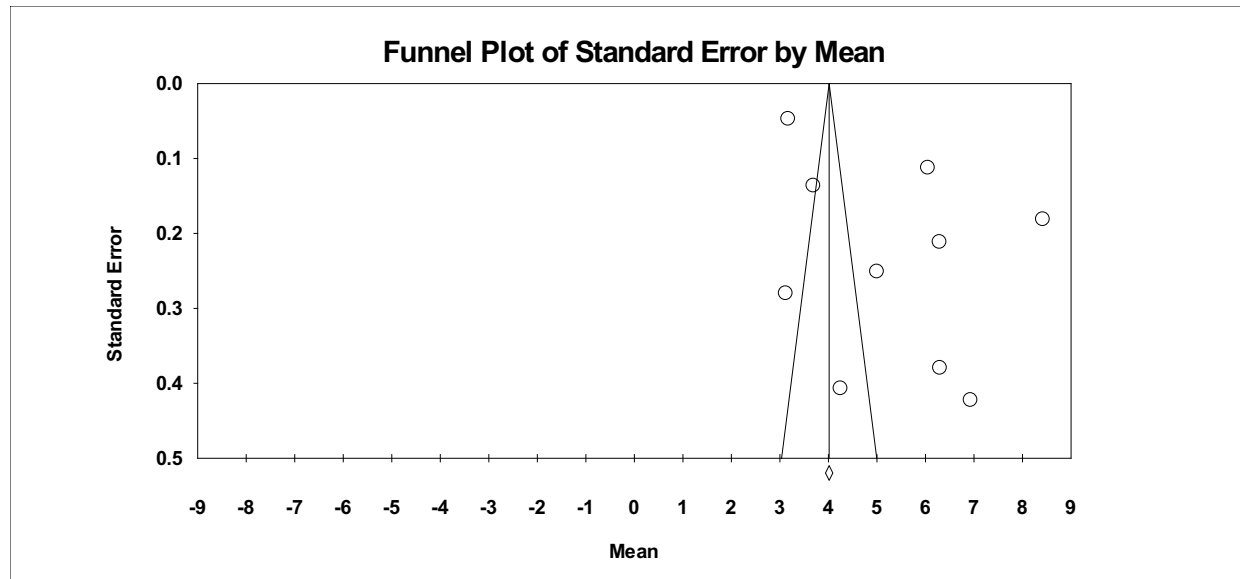

**Figure S4. Funnel plot for mean NLR according to studies reported in-hospital mortality.**

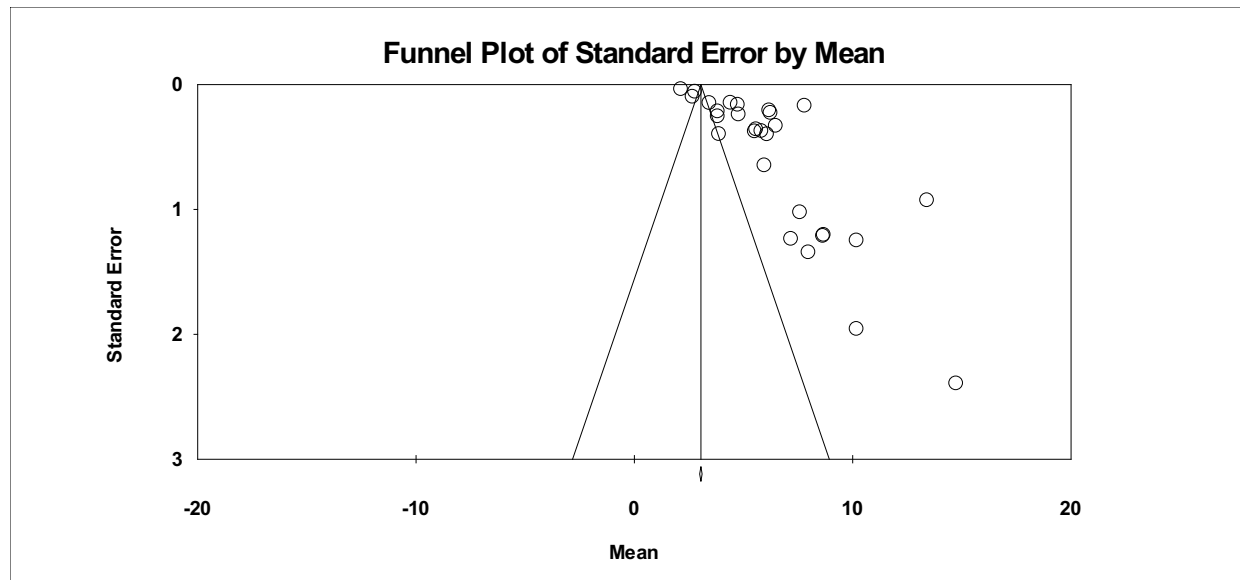

**Figure S5. Funnel plot for mean NLR according to studies reported death or survived groups.**

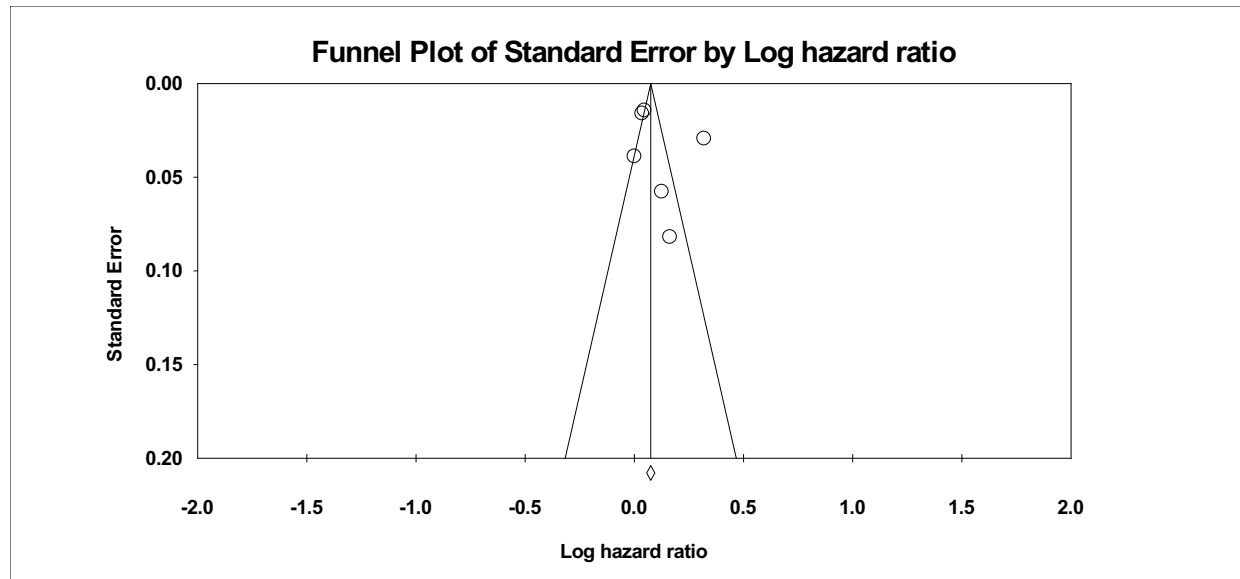

**Figure S6. Funnel plot for NLR (as continuous variable) mortality hazard ratio.**
